# Supplementary material for: Serotonergic regulation of bipolar cell survival in the developing cerebral cortex
Source: PubMed Central journal article supplement (PMC9638000; doi:10.1016/j.celrep.2022.111037), 2022-07-05
Supplement: mmc1.pdf [file mmc1.pdf]

**Cell Reports, Volume 40**

**Supplemental information**

**Serotonergic regulation of bipolar cell survival  
in the developing cerebral cortex**

**Fong Kuan Wong, Martijn Selten, Claudia Rosés-Novella, Varun Sreenivasan, Noemí Pallas-Bazarra, Eleni Serafeimidou-Pouliou, Alicia Hanusz-Godoy, Fazal Oozeer, Robert Edwards, and Oscar Marín**

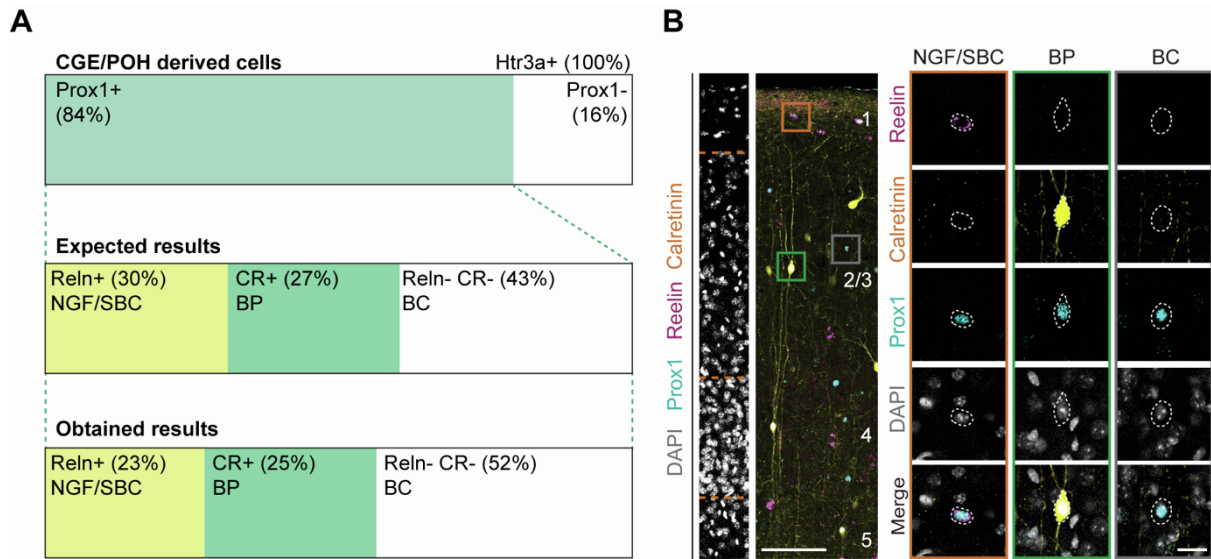

**Figure S1. Validation of immunofluorescent strategy** related to Figure 1-7

(A) Validation of immunofluorescent strategy. Quantification of percentage of all Htr3a+ interneurons (Prox1+), neurogliaform cells (Prox1+ and ReIn+), bipolar cells (Prox1+ and CR+) and CGE-derived basket cells (Prox1+, ReIn- and CR-) in wild type mice ( $n = 5$  mice) at P21. Chi-squared test,  $p = 0.16$ .

(B) Coronal sections through the primary somatosensory cortex of wild type mice at P21 (left) with higher magnifications on the right for neurogliaform/single bouquet cells (yellow box), bipolar cells (green box) and basket cells (grey box) immunostained for Prox1 (cyan), mCherry (red) and calretinin (yellow). DAPI is shown for counterstaining (grey).

Scale bars, 100  $\mu\text{m}$  (left), 20  $\mu\text{m}$  (right).

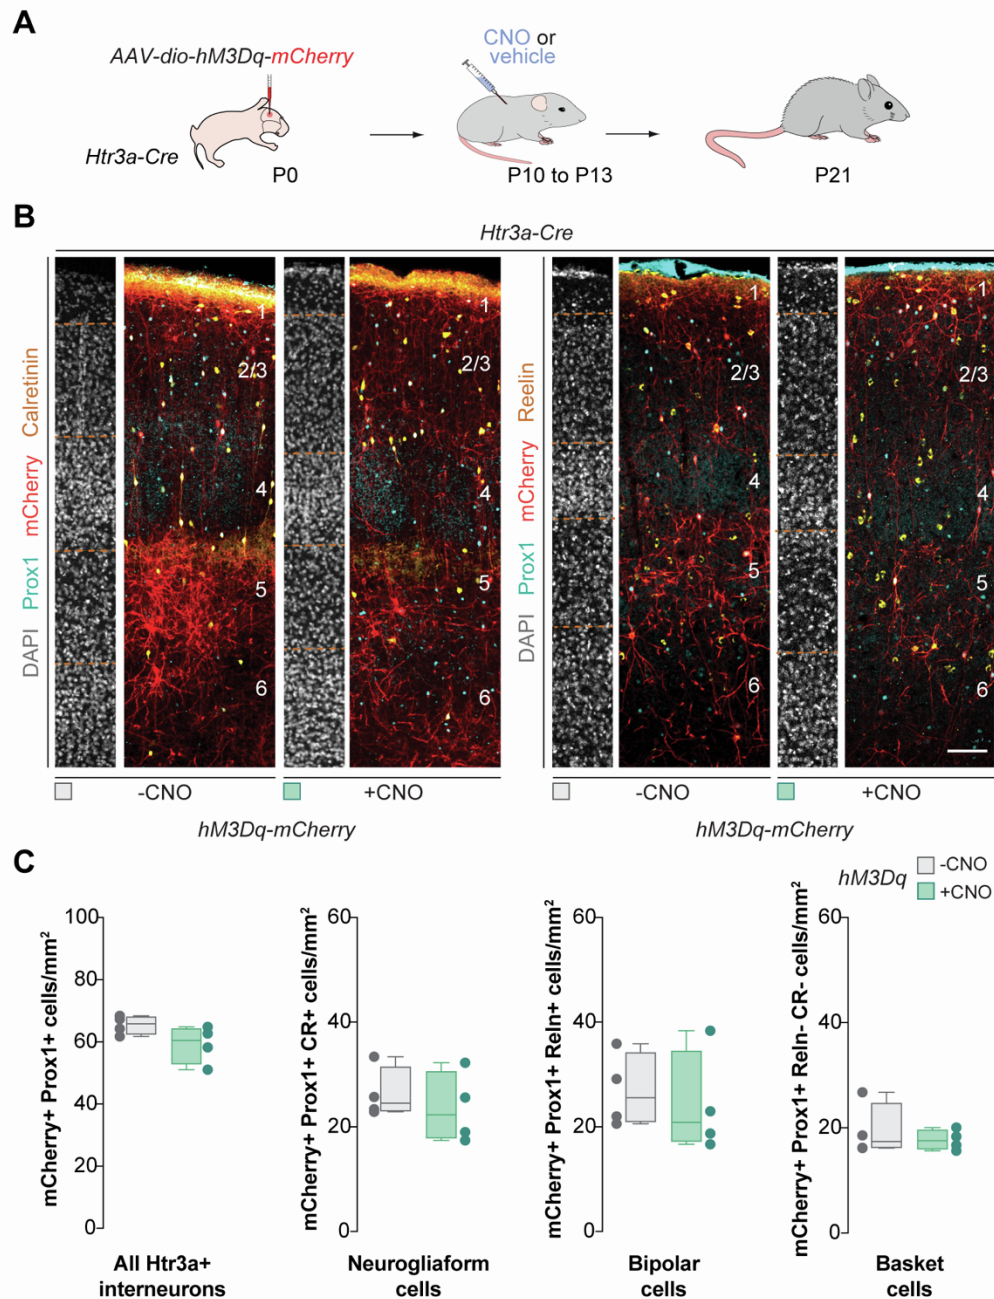

**Figure S2. Cell-autonomous changes in neuronal activity beyond the normal period of cell death do not affect the survival of Htr3a+ interneurons** related to Figure 3

(A) Schematic of experimental design.

(B) Coronal sections through the primary somatosensory cortex of *Htr3a-Cre* mice at P21 injected with *hM3Dq-mCherry* (left) followed by vehicle or CNO treatment immunostained for Prox1 (cyan), mCherry (red), calretinin (yellow, left) and reelin (yellow, right). DAPI is shown for counterstaining (grey).

(C) Quantification of the density of all transfected Htr3a+ interneurons (mCherry+, Prox1+), neurogliaform cells (mCherry+, Prox1+ and ReIn+), bipolar cells (mCherry+, Prox1+ and CR+), and basket cells (mCherry+, Prox1+, ReIn- and CR-) in control (grey box plots,  $n = 4$  mice) and CNO treated mice injected with *hM3Dq-mCherry* (green box plots,  $n = 4$  mice) at P21. Prox1+; two-tailed unpaired Student's t-test,  $p = 0.12$ . Prox1+ ReIn+; two-tailed unpaired Student's t-test,  $p = 0.67$ . Prox1+ and CR+; two-tailed unpaired Student's t-test,  $p = 0.55$ . Prox1+, ReIn- and CR-; two-tailed unpaired Student's t-test,  $p = 0.54$ .

Data in panels C are shown as boxplots (median, middle dash), lower and upper quartiles (box borders), and minimum and maximum (whiskers) and the adjacent data points indicate the average cell density in each animal. Scale bar, 100  $\mu\text{m}$ .

**A**

AAV-dio-hM3Dq-mCherry  
or  
AAV-dio-hM4Di-mCherry

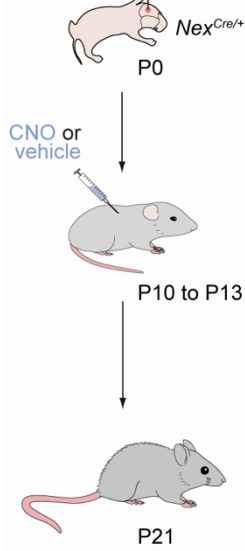**B**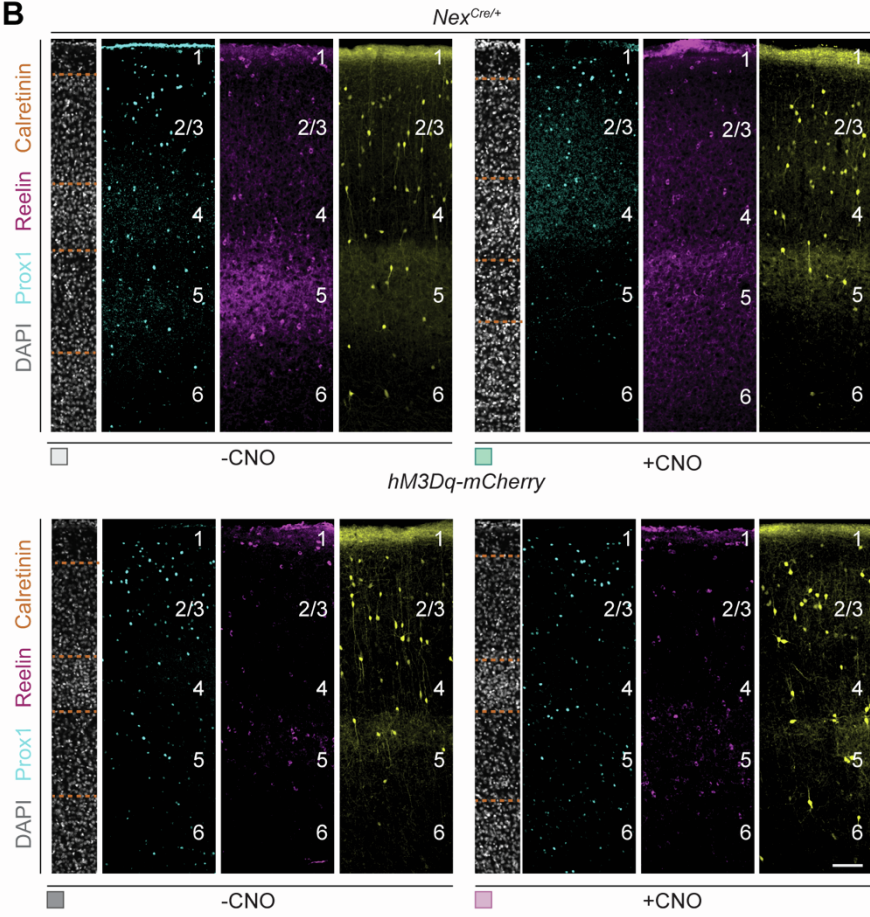**C**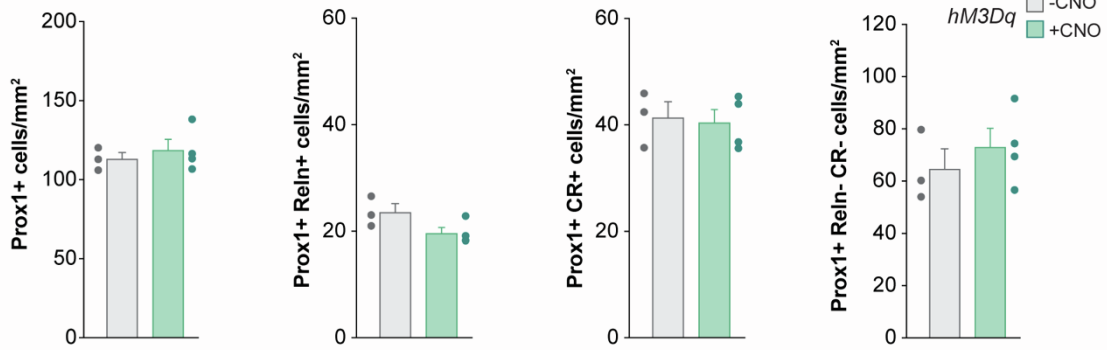**D**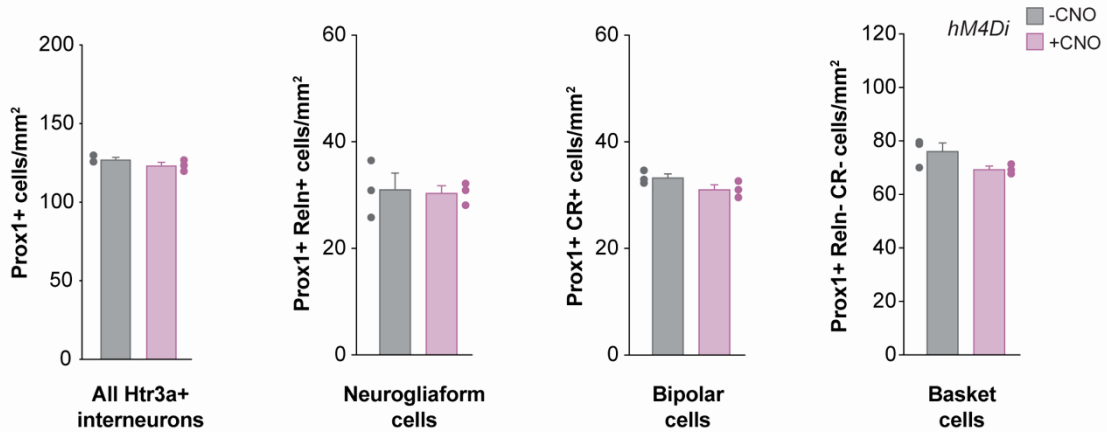

**Figure S3. Non-cell autonomous changes in neuronal activity beyond the normal period of cell death do not affect the survival of Htr3a+ interneuron** related to Figure 4

(A) Schematic of experimental design.

(B) Coronal sections through the primary somatosensory cortex of *Nes<sup>Cre/+</sup>* mice at P21 injected with *hM3Dq-mCherry* virus (top) or *hM4Di-mCherry* (bottom) virus followed by vehicle (left) or CNO (right) treatment immunostained for Prox1 (cyan), reelin (magenta) and calretinin (yellow). DAPI is shown for counterstaining (grey).

(C) Quantification of the density of all Htr3a+ interneurons (Prox1+), neurogliaform cells (Prox1+ and Reln+), bipolar cells (Prox1+ and CR+), and basket cells (Prox1+, Reln- and CR-) in control (grey box plots,  $n = 3$  mice) and CNO treated mice injected with hM3Dq-mCherry (green box plots,  $n = 4$  mice) at P21. Prox1+; two-tailed unpaired Student's t-test,  $p = 0.55$ . Prox1+ Reln+; two-tailed unpaired Student's t-test,  $p = 0.09$ . Prox1+ and CR+; two-tailed unpaired Student's t-test,  $p = 0.82$ . Prox1+, Reln- and CR-; two-tailed unpaired Student's t-test,  $p = 0.47$ .

(D) Quantification of the density of all Htr3a+ interneurons (Prox1+), neurogliaform cells (Prox1+ and Reln+), bipolar cells (Prox1+ and CR+), and basket cells (Prox1+, Reln- and CR-) in control (grey box plots,  $n = 3$  mice) and CNO treated mice injected with *hM4Di-mCherry* (red box plots,  $n = 3$  mice) at P21. Prox1+; two-tailed unpaired Student's t-test,  $p = 0.20$ . Prox1+ Reln+; two-tailed unpaired Student's t-test,  $p = 0.85$ . Prox1+ and CR+; two-tailed unpaired Student's t-test,  $p = 0.12$ . Prox1+, Reln- and CR-; two-tailed unpaired Student's t-test,  $p = 0.10$ .

Data in panels C and D are shown as bar graphs + SEM, and the adjacent data points indicate the average cell density in each animal.

Scale bar, 100  $\mu\text{m}$ .

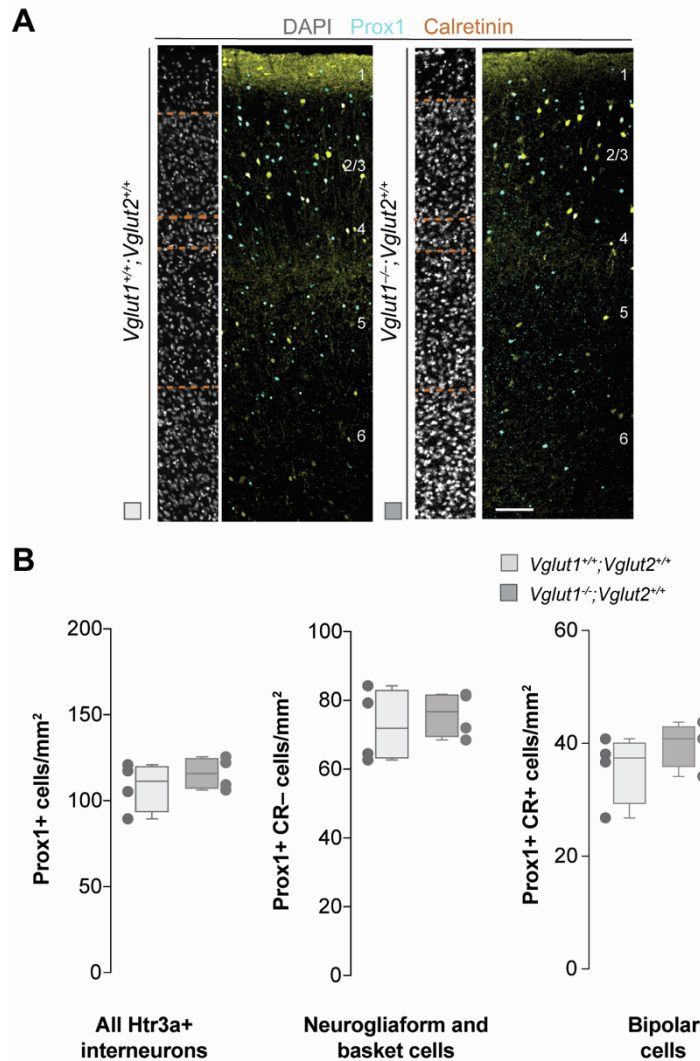

**Figure S4. Removal of *Vglut1* is not sufficient to alter the survival of Htr3a+ interneurons** related to Figure 5

(A) Coronal sections through the primary motor cortex of *Vglut1<sup>+/+</sup>;Vglut2<sup>+/+</sup>* mice ipsilaterally injected with Cre-expressing virus (left) and of the contralateral cortex of *Vglut1<sup>-/-</sup>;Vglut2<sup>+/+</sup>* mice injected with Cre-expressing virus (right) at P21 following immunohistochemistry against Prox1 (cyan) and calretinin (yellow). DAPI is shown for counterstaining (grey).

(B) Quantification of the density of all Htr3a+ interneurons (Prox1+), neurogliaform and basket cells (Prox1+ and CR-) and bipolar cells (Prox1+ and CR+) in *Vglut1<sup>+/+</sup>;Vglut2<sup>+/+</sup>* injected with Cre-expressing virus (light grey box plots,  $n = 4$  mice) and *Vglut1<sup>-/-</sup>;Vglut2<sup>+/+</sup>* mice injected with Cre-expressing virus at the contralateral (dark grey box plots,  $n = 4$  mice) at P21. Prox1+; two-tailed unpaired Student's t-test,  $p = 0.41$ . Prox1+ CR-; two-tailed unpaired Student's t-test,  $p = 0.63$ . Prox1+ and CR+; two-tailed unpaired Student's t-test,  $p = 0.29$ .

Data in panel B are shown as boxplots (median, middle dash), lower and upper quartiles (box borders), and minimum and maximum (whiskers) and the adjacent data points indicate the average cell density in each animal. Scale bar, 100  $\mu\text{m}$ .

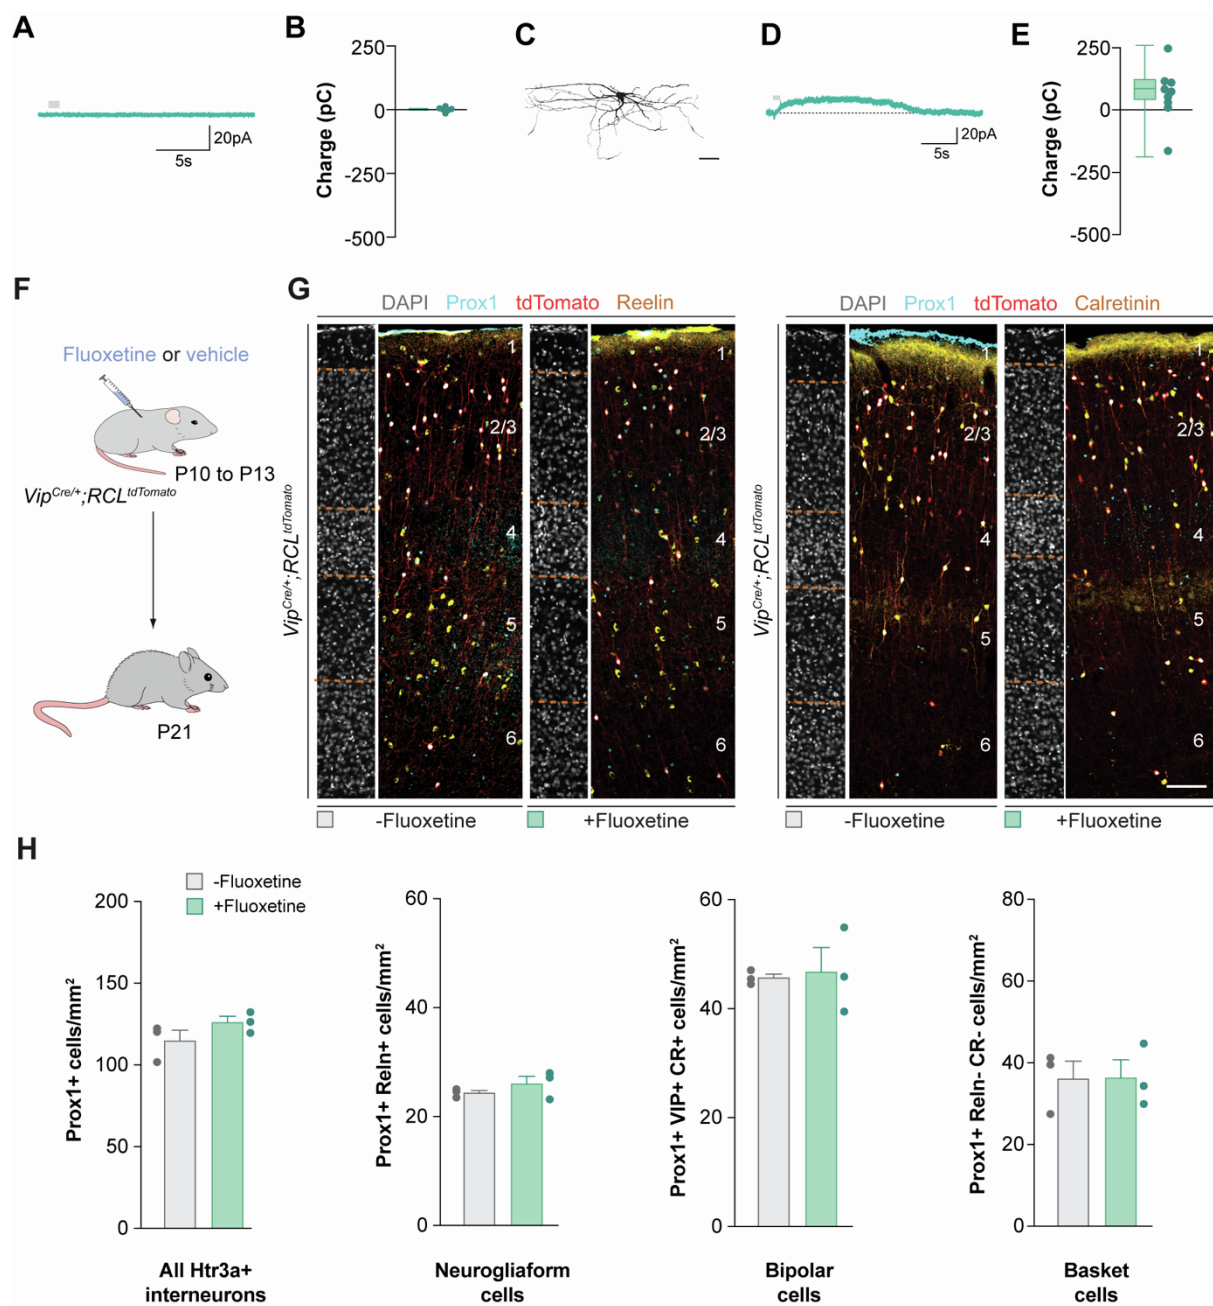

**Figure S5. Neurogliaform cells do not depolarize in response to serotonin, and changes in serotonin levels beyond the normal period of cell death do not affect the survival of bipolar cells** related to Figure 6

(A) Example of voltage-clamp traces of L2/3 GFP+ cells in response to aCSF puffs (grey bars).

(B) Quantification of cell charge of L2/3 GFP+ (green box plot,  $n = 4$  cells).

(C) Typical morphology of reconstructed neurogliaform cell.

(D) Example of voltage-clamp traces of neurogliaform in response to serotonin puffs (grey bars).

(E) Quantification of cell charge of L1 neurogliaform cell (green box plot,  $n = 9$  cells).

(F) Schematic of experimental design.

(G) Coronal sections through the primary somatosensory cortex of *Vip<sup>Cre/+</sup>;RCL<sup>tdTomato</sup>* mice at P21 injected vehicle or fluoxetine treatment immunostained for Prox1 (cyan), tdTomato (red) and reelin (yellow, left) or calretinin (yellow, right). DAPI is shown for counterstaining (grey).

(H) Quantification of the density of all Htr3a+ interneurons (Prox1+), neurogliaform (Prox1+ and Reln+), bipolar cells (Prox1+, VIP+ and CR+) and basket cells (Prox1+ Reln- and CR-) in control (grey bars,  $n = 3$  mice) and fluoxetine injected mice (green box bars,  $n = 3$  mice) at P21. Prox1+; two-tailed unpaired Student's t-test,  $p = 0.21$ . Prox1+ and Reln+; two-tailed unpaired Student's t-test,  $p = 0.30$ . Prox1+, VIP+ and CR+: two-tailed unpaired Student's t-test:  $p = 0.43$ . Prox1+, CR- and Reln-; two-tailed unpaired Student's t-test,  $p = 0.97$ .

Data in panels B and E are shown as boxplots (median, middle dash), lower and upper quartiles (box borders), and minimum and maximum (whiskers), and the adjacent data points indicate the cell charge for each cell. Data in panel H are shown as bar graphs + SEM, and the adjacent data points indicate the average cell density in each animal.

Scale bar,  $100 \mu\text{m}$ .



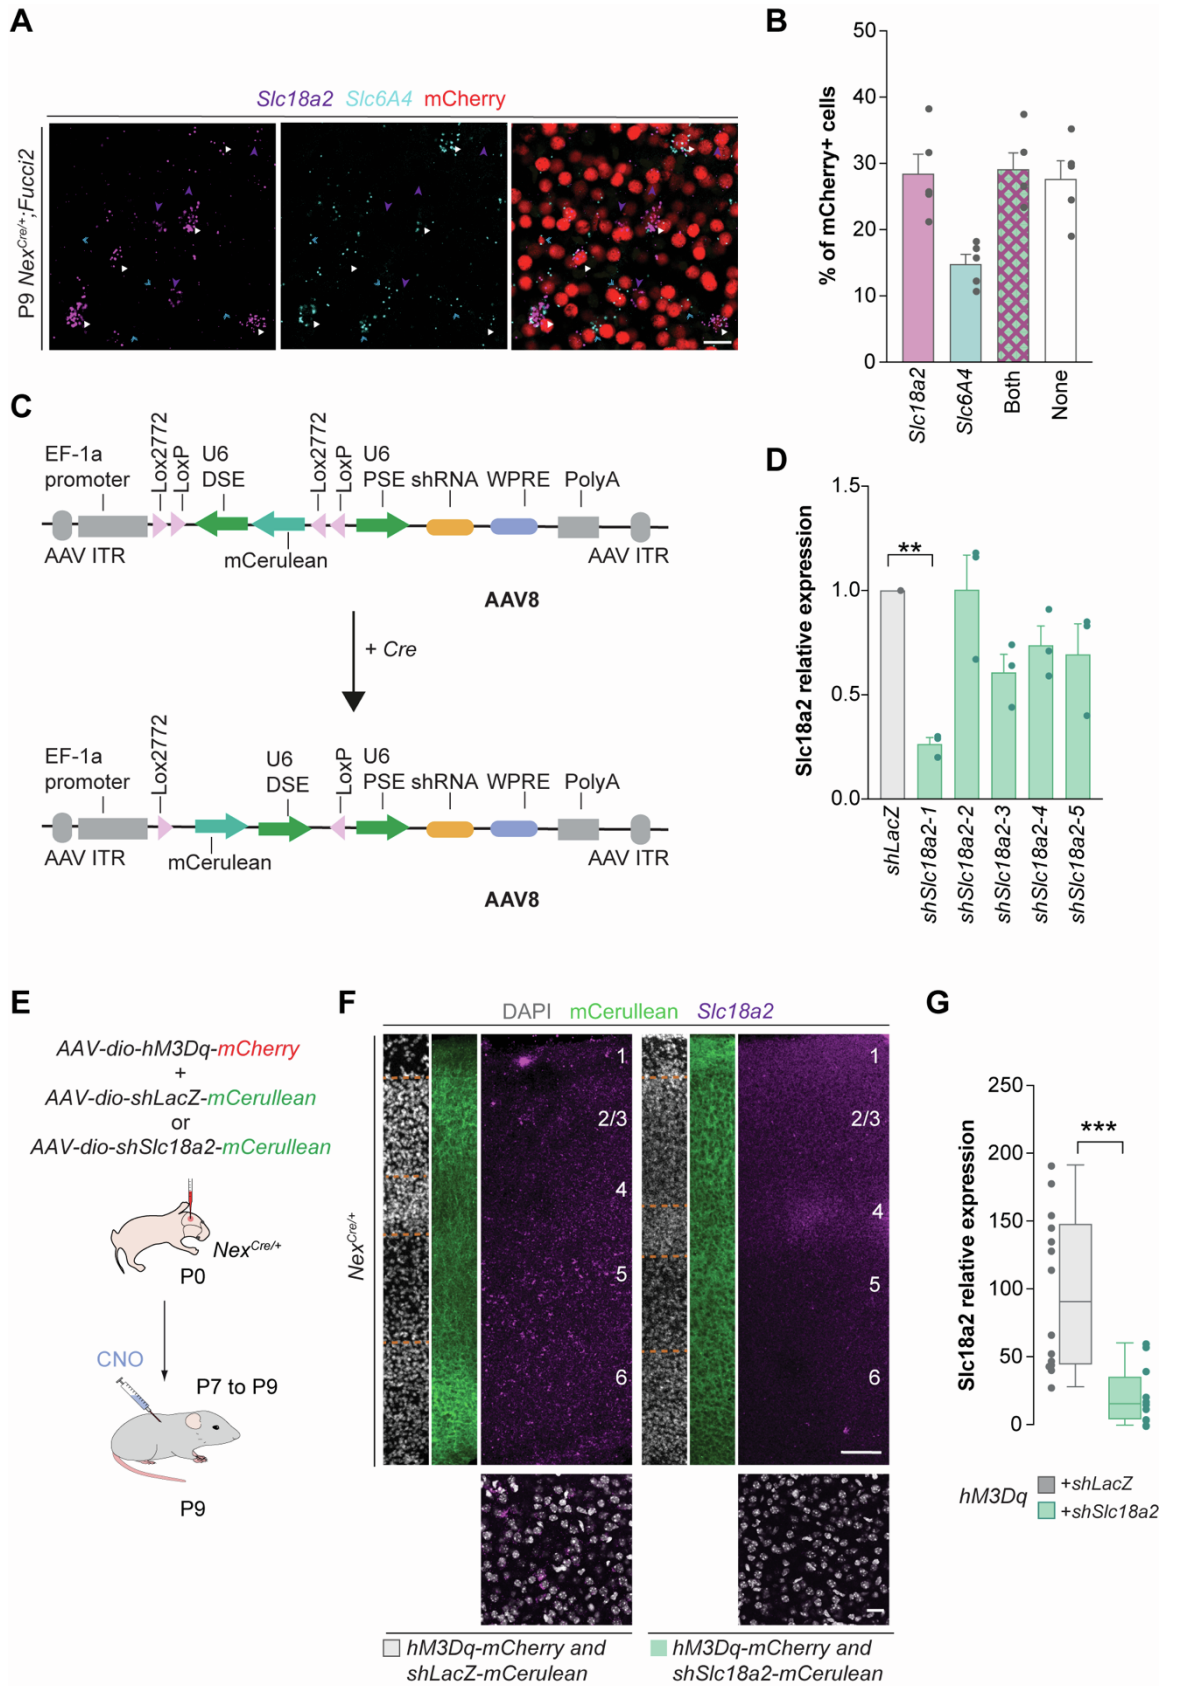

**Figure S6. Validation of shSlc18a2-mCerulean construct** related to Figure 7

(A) Coronal sections through the infragranular layers of the neocortex of *Nex<sup>Cre/+</sup>; Fucci2* mice at P9 immunostained for mCherry (red), and RNAscope for *Slc18a2* (magenta) and *Slc6A4* (cyan). White arrowheads

are examples of pyramidal cells expressing both *Slc18a2* and *Slc6a4*, magenta arrowheads for *Slc18a2* only and cyan arrowheads for *Slc6a4* only.

(B) Quantification of mCherry+ cells expressing *Slc18a2* (magenta bar,  $n = 5$  mice), *Slc6A4* (cyan bar,  $n = 5$  mice), both *Slc18a2* and *Slc6a4* (checkered bar,  $n = 5$  mice) or none of these genes (white bar,  $n = 5$  mice).

(C) Schematic of plasmid design.

(D) Quantification of *Slc18a2* relative expression in vitro using qPCR with control (shLacZ, grey bar,  $n = 3$  biological replicates) and sh18a2 constructs 1 to 5 (green bars,  $n = 3$  biological replicates). *shSlc18a2-1*: one-way ANOVA with Dunnett's multiple comparison,  $**p = 0.0015$ ; *shSlc18a2-2*: one-way ANOVA with Dunnett's multiple comparison,  $p = 0.99$ ; *shSlc18a2-3*: one-way ANOVA with Dunnett's multiple comparison,  $p = 0.08$ ; *shSlc18a2-4*: one-way ANOVA with Dunnett's multiple comparison,  $p = 0.32$ ; *shSlc18a2-5*: one-way ANOVA with Dunnett's multiple comparison,  $p = 0.21$ . *shSlc18a2-1* was selected for in vivo experiments.

(E) Schematic of experimental design.

(F) Coronal sections through the primary somatosensory cortex of *Nes<sup>Cre/+</sup>* mice at P9 injected with *hM3Dq-mCherry* and *shLacZ-mCerulean* (left) or *shSlc18a2-mCerulean* (right) virus followed by CNO treatment immunostained for mCerulean (green), and RNAscope for *Slc18a2* (magenta). DAPI is shown for counterstaining (grey). The insert below is a higher magnification of L5 of the RNAscope for *Slc18a2* (magenta) and DAPI counterstain.

(G) Quantification of the relative expression of *Slc18a2* of L5 and 6 with control (shLacZ, grey box plot,  $n = 14$  images) and sh18a2 constructs (green box plot,  $n = 12$  images). Mann Whitney test,  $***p < 0.0001$ .

Data in panels B and D are shown as bar graphs  $\pm$  SEM. The adjacent data points indicate the average cell density in each animal (B) and average expression from each biological replicate. Data in panel G are shown as boxplots (median, middle dash), lower and upper quartiles (box borders), and minimum and maximum (whiskers). The adjacent data points indicate the number of images.

Scale bars, 20  $\mu$ m (A) and 100  $\mu$ m (F).

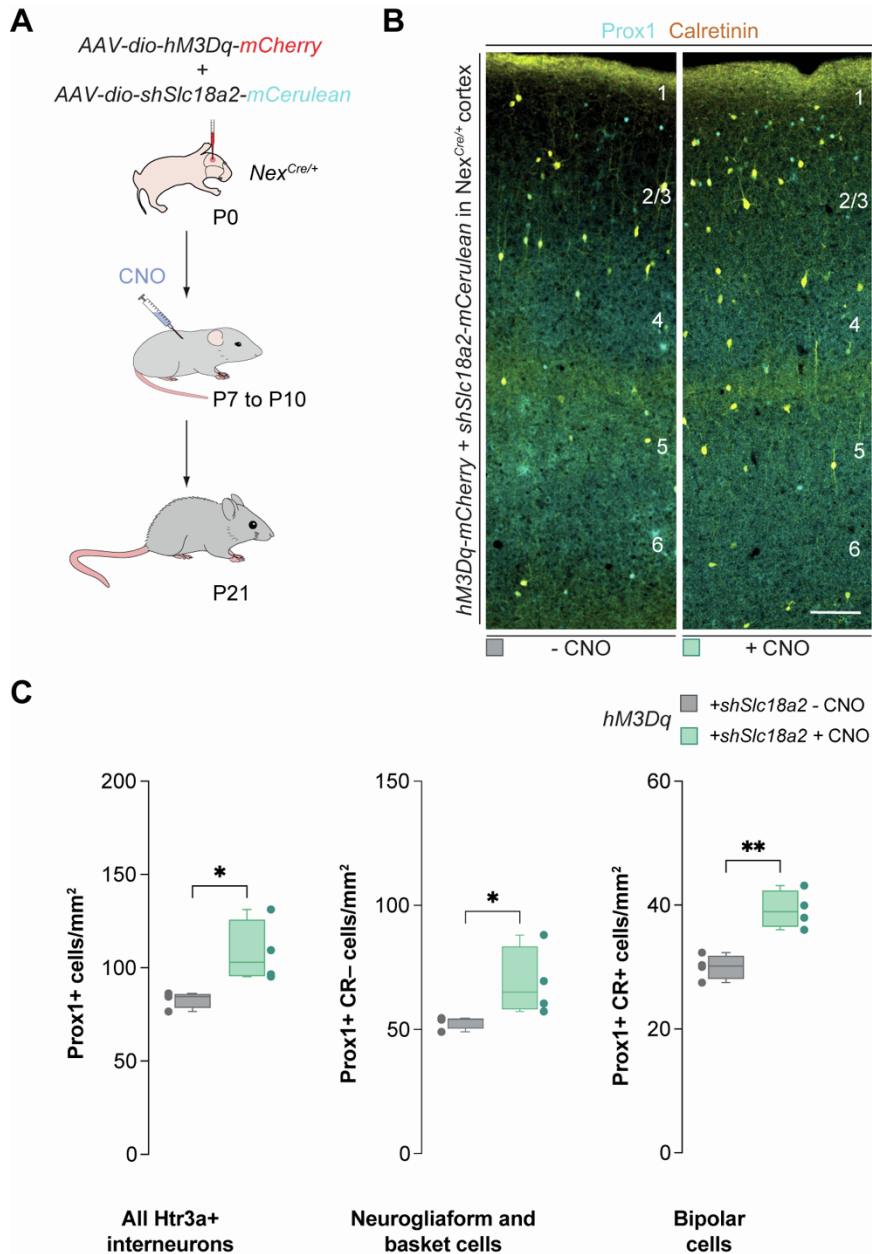

**Figure S7. Knockdown of Slc18a2 alone is not sufficient to prevent the cell death of Htr3a+ interneurons** related to Figure 7

(A) Schematic of experimental design.

(B) Coronal sections through the primary somatosensory cortex of Nex<sup>Cre/+</sup> mice at P21 injected with hM3Dq-mCherry and shSlc18a2-mCerulean virus followed by vehicle (left) or CNO (right) treatment immunostained for Prox1 (cyan), and calretinin (yellow).

(C) Quantification of the density of all Htr3a+ interneurons (Prox1+), neurogliaform and basket cells (Prox1+ and CR-) and bipolar cells (Prox1+ and CR+) in shSlc18a2-mCerulean mice followed by vehicle (grey box plots,  $n = 4$  mice) or CNO treatment (green box plots,  $n = 4$  mice) at P21. All mice were injected with the hM3Dq-mCherry virus. Prox1+; two-tailed unpaired Student's t-test,  $*p = 0.027$ . Prox1+ CR-; Mann-Whitney,  $*p = 0.029$ . Prox1+ and CR+; two-tailed unpaired Student's t-test,  $**p = 0.0023$ .

Data in panel C are shown as boxplots (median, middle dash), lower and upper quartiles (box borders), and minimum and maximum (whiskers) and the adjacent data points indicate the average cell density in each animal. Scale bar, 100  $\mu$ m.

**Table S1.** Summary of data and statistical analyses, related to Figures 1-7 and Figures S1-S7

| FIGURE 1  | Measurement                                 | Values                                                                                                | N                                                        | Statistical                        | P value            |
|-----------|---------------------------------------------|-------------------------------------------------------------------------------------------------------|----------------------------------------------------------|------------------------------------|--------------------|
| Figure 1B | CGE interneuron cell densities (mean ± SEM) | <b>Prox1+</b> : Control Htr3a-Cre: 128.93891 ± 9.7075; Htr3aCreBaxBak: 170.999 ± 7.6148               | [brains] Control Htr3a-Cre, n = 5, Htr3aCreBaxBak, n = 4 | 2-tailed unpaired Student's t-test | $p = 0.0138$ (*)   |
|           |                                             | <b>Prox1+ Re+</b> : Control Htr3a-Cre: 30.018342 ± 2.4084662; Htr3aCreBaxBak: 39.798868 ± 2.812634    | [brains] Control Htr3a-Cre, n = 5, Htr3aCreBaxBak, n = 4 | 2-tailed unpaired Student's t-test | $p = 0.0327$ (*)   |
|           |                                             | <b>Prox1+ CR+</b> : Control Htr3a-Cre: 33.222357 ± 2.5819982; Htr3aCreBaxBak: 44.76981 ± 3.1535676    | [brains] Control Htr3a-Cre, n = 5, Htr3aCreBaxBak, n = 4 | 2-tailed unpaired Student's t-test | $p = 0.0309$ (*)   |
|           |                                             | <b>Prox1+ CR-Re-</b> : Control Htr3a-Cre: 65.698208 ± 6.7524041; Htr3aCreBaxBak: 86.430708 ± 3.031828 | [brains] Control Htr3a-Cre, n = 5, Htr3aCreBaxBak, n = 4 | 2-tailed unpaired Student's t-test | $p = 0.0327$ (*)   |
| FIGURE 2  | Measurement                                 | Values                                                                                                | N                                                        | Statistical                        | P value            |
| Figure 2B | CGE interneuron cell densities (mean ± SEM) | <b>Prox1+</b> : hM3Dq-CNO: 63.134157 ± 2.855373; hM3Dq+CNO: 77.079124 ± 2.998725                      | [brains] n = 6 for both groups                           | 2-tailed unpaired Student's t-test | $p = 0.007$ (**)   |
|           |                                             | <b>Prox1+ Re+</b> : hM3Dq-CNO: 18.0878276 ± 1.22917991; hM3Dq+CNO: 25.807598 ± 2.9800354              | [brains] n = 6 for both groups                           | 2-tailed unpaired Student's t-test | $p = 0.0377$ (*)   |
|           |                                             | <b>Prox1+ CR+</b> : hM3Dq-CNO: 23.053624 ± 1.6097517; hM3Dq+CNO: 31.14537 ± 1.8146412                 | [brains] n = 6 for both groups                           | 2-tailed unpaired Student's t-test | $p = 0.0121$ (*)   |
|           |                                             | <b>Prox1+ CR-Re-</b> : hM3Dq-CNO: 27.4930811 ± 3.02664295; hM3Dq+CNO: 37.6835104 ± 2.75023481         | [brains] n = 6 for both groups                           | 2-tailed unpaired Student's t-test | $p = 0.0319$ (*)   |
| Figure 2C | CGE interneuron cell densities (mean ± SEM) | <b>Prox1+</b> : hM4Di-CNO: 68.915974 ± 5.2489537; hM4Di+CNO: 55.0325501 ± 1.96627922                  | [brains] hM4Di -CNO, n = 4, hM4Di+CNO n = 5              | 2-tailed unpaired Student's t-test | $p = 0.0259$ (*)   |
|           |                                             | <b>Prox1+ Re+</b> : hM4Di-CNO: 24.9941011 ± 1.1484826; hM4Di+CNO: 17.5705351 ± 1.39640632             | [brains] hM4Di -CNO, n = 4, hM4Di+CNO n = 5              | 2-tailed unpaired Student's t-test | $p = 0.0055$ (**)  |
|           |                                             | <b>Prox1+ CR+</b> : hM4Di-CNO: 30.0366435 ± 2.11197677; hM4Di+CNO: 21.4524183 ± 1.13356151            | [brains] hM4Di -CNO, n = 4, hM4Di+CNO n = 5              | 2-tailed unpaired Student's t-test | $p = 0.0047$ (**)  |
|           |                                             | <b>Prox1+ CR-Re-</b> : hM4Di-CNO: 20.8646658 ± 0.74526041; hM4Di+CNO: 12.2050725 ± 0.83210095         | [brains] hM4Di -CNO, n = 4, hM4Di+CNO n = 5              | 2-tailed unpaired Student's t-test | $p = 0.0001$ (***) |
| FIGURE 3  | Measurement                                 | Values                                                                                                | N                                                        | Statistical                        | P value            |
| Figure 3B | CGE interneuron cell densities (mean ± SEM) | <b>Prox1+</b> : Control Nex-Cre: 125.955086 ± 4.9773057; NexCreBaxBak: 171.70553 ± 8.352957           | [brains] n = 7 for both groups                           | 2-tailed unpaired Student's t-test | $p = 0.0005$ (***) |
|           |                                             | <b>Prox1+ Re+</b> : Control Nex-Cre: 29.690536 ± 1.9780853; NexCreBaxBak: 38.699654 ± 2.2600626       | [brains] n = 7 for both groups                           | 2-tailed unpaired Student's t-test | $p = 0.0113$ (*)   |
|           |                                             | <b>Prox1+ CR+</b> : Control Nex-Cre: 29.707267 ± 1.3975519; NexCreBaxBak: 42.090428 ± 3.091244        | [brains] n = 7 for both groups                           | 2-tailed unpaired Student's t-test | $p = 0.0036$ (**)  |
|           |                                             | <b>Prox1+ CR-Re-</b> : Control Nex-Cre: 66.553056 ± 3.38164542; NexCreBaxBak: 90.979209 ± 4.2374106   | [brains] n = 7 for both groups                           | 2-tailed unpaired Student's t-test | $p = 0.002$ (**)   |
| FIGURE 4  | Measurement                                 | Values                                                                                                | N                                                        | Statistical                        | P value            |
| Figure 4C | CGE interneuron cell densities (mean ± SEM) | <b>Prox1+</b> : hM3Dq-CNO: 140.22185 ± 6.1886976; hM3Dq+CNO: 168.24575 ± 9.2067176                    | [brains] n = 7 for both groups                           | 2-tailed unpaired Student's t-test | $p = 0.0266$ (*)   |
|           |                                             | <b>Prox1+ Re+</b> : hM3Dq-CNO: 30.5171011 ± 1.28699855; hM3Dq+CNO: 40.5280454 ± 1.0966376             | [brains] n = 7 for both groups                           | 2-tailed unpaired Student's t-test | $p < 0.0001$ (***) |
|           |                                             | <b>Prox1+ CR+</b> : hM3Dq-CNO: 41.618613 ± 1.9027866; hM3Dq+CNO: 51.031663 ± 1.7405535                | [brains] n = 7 for both groups                           | 2-tailed unpaired Student's t-test | $p = 0.0033$ (**)  |
|           |                                             | <b>Prox1+ CR-Re-</b> : hM3Dq-CNO: 42.1597898 ± 2.2139241; hM3Dq+CNO: 60.3700123 ± 3.03048226          | [brains] n = 7 for both groups                           | 2-tailed unpaired Student's t-test | $p = 0.0004$ (***) |

|                  |                                             |                                                                                                                   |                                                          |                                    |                   |
|------------------|---------------------------------------------|-------------------------------------------------------------------------------------------------------------------|----------------------------------------------------------|------------------------------------|-------------------|
| Figure 4D        | CGE interneuron cell densities (mean ± SEM) | <b>Prox1+</b> : hM4Di-CNO: 175.759708 ± 6.2889318; hM4Di+CNO:153.962902 ± 6.37779553                              | [brains] n = 6 for both groups                           | 2-tailed unpaired Student's t-test | $p = 0.0352$ (*)  |
|                  |                                             | <b>Prox1+ Re+</b> : hM4Di-CNO: 34.9688292 ± 1.89106344; hM4Di+CNO: 26.9684615 ± 1.43152338                        | [brains] hM4Di -CNO, n = 5, hM4Di+CNO n = 6              | 2-tailed unpaired Student's t-test | $p = 0.0074$ (**) |
|                  |                                             | <b>Prox1+ CR+</b> : hM4Di-CNO: 50.7213356 ± 1.6083140; hM4Di+CNO: 40.5899939 ± 3.37004675                         | [brains] n = 6 for both groups                           | 2-tailed unpaired Student's t-test | $p = 0.0218$ (*)  |
|                  |                                             | <b>Prox1+ CR-Re-</b> : hM4Di-CNO: 76.786516 ± 4.023283; hM4Di+CNO: 58.709725 ± 5.5024846                          | [brains] n = 6 for both groups                           | 2-tailed unpaired Student's t-test | $p = 0.0242$ (*)  |
| <b>FIGURE 5</b>  | Measurement                                 | Values                                                                                                            | N                                                        | Statistical                        | P value           |
| Figure 5D        | CGE interneuron cell densities (mean ± SEM) | <b>Prox1+</b> : Control: 108.282796 ± 7.10449118; VG1/VG2 KO: 90.2908768 ± 5.94786571                             | [brains] n = 4 for both groups                           | 2-tailed unpaired Student's t-test | $p = 0.1002$ (NS) |
|                  |                                             | <b>Prox1+ CR-</b> : Control: 72.6899503 ± 5.35347727; VG1/VG2 KO: 54.7620478 ± 2.43474891                         | [brains] n = 4 for both groups                           | 2-tailed unpaired Student's t-test | $p = 0.026$ (*)   |
|                  |                                             | <b>Prox1+ CR+</b> : Control: 35.5928459 ± 3.05633804; VG1/VG2 KO: 35.528829 ± 3.99582597                          | [brains] n = 4 for both groups                           | 2-tailed unpaired Student's t-test | $p = 0.9903$ (NS) |
| <b>FIGURE 6</b>  | Measurement                                 | Values                                                                                                            | N                                                        | Statistical                        | P value           |
| Figure 6C        | Charge (mean ± SEM)                         | L2/3 Bipolar cells: 76704.81 ± 29550.95                                                                           | [cells] n = 7                                            |                                    |                   |
|                  |                                             | L2/3 Basket cells: -229518 ± 51407.16                                                                             | [cells] n = 7                                            |                                    |                   |
| Figure 6D        | CGE interneuron cell densities (mean ± SEM) | <b>Prox1+</b> : Vehicle: 140.167528 ± 5.97875389; Fluoxetine: 146.833266 ± 10.612415                              | [brains] n = 4 for both groups                           | 2-tailed unpaired Student's t-test | $p = 0.6093$ (NS) |
|                  |                                             | <b>Prox1+ Re+</b> : Vehicle: 145.348521 ± 5.79093263; Fluoxetine: 151.235858 ± 18.8224061                         | [brains] n = 4 for both groups                           | 2-tailed unpaired Student's t-test | $p = 0.9834$ (NS) |
|                  |                                             | <b>Prox1+ VIP+ CR+</b> : Vehicle: 36.6817236 ± 1.65394208; Fluoxetine: 49.087944 ± 3.12794821                     | [brains] n = 4 for both groups                           | 2-tailed unpaired Student's t-test | $p = 0.0127$ (*)  |
|                  |                                             | <b>Prox1+ CR-Re-</b> : Vehicle: 55.493346 ± 8.7814519; Fluoxetine: 41.861755 ± 5.0760216                          | [brains] n = 4 for both groups                           | 2-tailed unpaired Student's t-test | $p = 0.2276$ (NS) |
| <b>FIGURE 7</b>  | Measurement                                 | Values                                                                                                            | N                                                        | Statistical                        | P value           |
| Figure 7C        | CGE interneuron cell densities (mean ± SEM) | <b>Prox1+</b> : shLacZ: 117.845708 ± 7.74735528; shVmat2: 111.997696 ± 8.354898                                   | [brains] n = 4 for both groups                           | 2-tailed unpaired Student's t-test | $p = 0.5347$ (NS) |
|                  |                                             | <b>Prox1+ CR-</b> : shLacZ: 72.9697875 ± 7.84245371; shVmat2: 71.6411254 ± 6.92400581                             | [brains] n = 4 for both groups                           | 2-tailed unpaired Student's t-test | $p = 0.8547$ (NS) |
|                  |                                             | <b>Prox1+ CR+</b> : shLacZ: 44.8759186 ± 1.32738498; shVmat2: 39.2727969 ± 1.52053381                             | [brains] n = 4 for both groups                           | 2-tailed unpaired Student's t-test | $p = 0.0343$ (*)  |
| <b>FIGURE S1</b> | Measurement                                 | Values                                                                                                            | N                                                        | Statistical                        | P value           |
| Figure S1A       | Proportion of cells (%)                     | <b>Expected results</b> : NGF/SBC: 30%; BP: 27%; BC: 43%; <b>Observed results</b> : NGF/SBC: 23%; BP: 25%; BC 52% | [brains] Control Htr3a-Cre, n = 5, Htr3aCreBaxBak, n = 4 | Chi-square                         | $p = 0.16$ (NS)   |
| <b>FIGURE S2</b> | Measurement                                 | Values                                                                                                            | N                                                        | Statistical                        | P value           |
| Figure S2C       | CGE interneuron cell densities (mean ± SEM) | <b>Prox1+</b> : hM3Dq-CNO: 66.284849 ± 1.5028887; hM3Dq+CNO: 60.064579 ± 3.047367                                 | [brains] n = 4 for both groups                           | 2-tailed unpaired Student's t-test | $p = 0.1169$ (NS) |
|                  |                                             | <b>Prox1+ Re+</b> : hM3Dq-CNO: 26.8957068 ± 3.53002062; hM3Dq+CNO: 25.1264708 ± 4.90953428                        | [brains] n = 4 for both groups                           | 2-tailed unpaired Student's t-test | $p = 0.6692$ (NS) |
|                  |                                             | <b>Prox1+ CR+</b> : hM3Dq-CNO: 26.3253613 ± 2.43294121; hM3Dq+CNO: 23.5634017 ± 3.39731554                        | [brains] n = 4 for both groups                           | 2-tailed unpaired Student's t-test | $p = 0.5532$ (NS) |
|                  |                                             | <b>Prox1+ CR-Re-</b> : hM3Dq-CNO: 19.42593 ± 2.509301; hM3Dq+CNO: 18.053787 ± 0.9675375                           | [brains] n = 4 for both groups                           | 2-tailed unpaired Student's t-test | $p = 0.5436$ (NS) |
| <b>FIGURE S3</b> | Measurement                                 | Values                                                                                                            | N                                                        | Statistical                        | P value           |
|                  |                                             | <b>Prox1+</b> : hM3Dq-CNO: 113.063459 ± 4.09645928; hM3Dq+CNO: 118.699518 ± 6.80751163                            | [brains] hM3Dq -CNO, n = 3, hM3Dq+CNO n = 4              | 2-tailed unpaired Student's t-test | $p = 0.5480$ (NS) |

|                  |                                             |                                                                                                                                                                                      |                                             |                                    |                                          |
|------------------|---------------------------------------------|--------------------------------------------------------------------------------------------------------------------------------------------------------------------------------------|---------------------------------------------|------------------------------------|------------------------------------------|
| Figure S3C       | CGE interneuron cell densities (mean ± SEM) | <b>Prox1+ Re+</b> : hM3Dq-CNO: 23.5569756 ± 1.62279407; hM3Dq+CNO: 19.612295 ± 1.10857406                                                                                            | [brains] hM3Dq -CNO, n = 3, hM3Dq+CNO n = 4 | 2-tailed unpaired Student's t-test | $p = 0.0910$ (NS)                        |
|                  |                                             | <b>Prox1+ CR+</b> : hM3Dq-CNO: 41.360781 ± 2.99063331; hM3Dq+CNO: 40.424176 ± 2.46681341                                                                                             | [brains] hM3Dq -CNO, n = 3, hM3Dq+CNO n = 4 | 2-tailed unpaired Student's t-test | $p = 0.8172$ (NS)                        |
|                  |                                             | <b>Prox1+ CR-Re-</b> : hM3Dq-CNO: 64.6671703 ± 7.73374349; hM3Dq+CNO: 73.0327285 ± 7.24395448                                                                                        | [brains] hM3Dq -CNO, n = 3, hM3Dq+CNO n = 4 | 2-tailed unpaired Student's t-test | $p = 0.4712$ (NS)                        |
| Figure S3D       | CGE interneuron cell densities (mean ± SEM) | <b>Prox1+</b> : hM4Di-CNO: 127.116395 ± 1.37724603; hM4Di+CNO: 123.338106 ± 2.02843504                                                                                               | [brains] n = 3 for both groups              | 2-tailed unpaired Student's t-test | $p = 0.1982$ (NS)                        |
|                  |                                             | <b>Prox1+ Re+</b> : hM4Di-CNO: 31.0610279 ± 3.09209328; hM4Di+CNO: 30.3948183 ± 1.20604652                                                                                           | [brains] n = 3 for both groups              | 2-tailed unpaired Student's t-test | $p = 0.8507$ (NS)                        |
|                  |                                             | <b>Prox1+ CR+</b> : hM4Di-CNO: 33.2822563 ± 0.71278089; hM4Di+CNO: 31.0766782 ± 0.1240153                                                                                            | [brains] n = 3 for both groups              | 2-tailed unpaired Student's t-test | $p = 0.1240$ (NS)                        |
|                  |                                             | <b>Prox1+ CR-Re-</b> : hM4Di-CNO: 76.1695 ± 3.079432; hM4Di+CNO: 69.42585 ± 1.046768                                                                                                 | [brains] n = 3 for both groups              | 2-tailed unpaired Student's t-test | $p = 0.1068$ (NS)                        |
| <b>Figure S4</b> | Measurement                                 | Values                                                                                                                                                                               | N                                           | Statistical                        | P value                                  |
| Figure S4B       | CGE interneuron cell densities (mean ± SEM) | <b>Prox1+</b> : <i>Vglut1+/+;Vglut2+/+</i> : 108.282796 ± 7.10449118 <i>Vglut1-/-;Vglut2+/+</i> : 115.77086 ± 4.7356754                                                              | [brains] n = 4 for all groups               | 2-tailed unpaired Student's t-test | $p = 0.4142$ (NS)                        |
|                  |                                             | <b>Prox1+ CR-</b> : <i>Vglut1+/+;Vglut2+/+</i> : 72.6899503 ± 5.35347727; <i>Vglut1-/-;Vglut2+/+</i> : 75.899582 ± 3.3346367                                                         | [brains] n = 4 for all groups               | 2-tailed unpaired Student's t-test | $p = 0.6290$ (NS)                        |
|                  |                                             | <b>Prox1+ CR+</b> : <i>Vglut1+/+;Vglut2+/+</i> : 35.5928459 ± 3.05633804; <i>Vglut1-/-;Vglut2+/+</i> : 39.871273 ± 2.0342391                                                         | [brains] n = 4 for all groups               | 2-tailed unpaired Student's t-test | $p = 0.2881$ (NS)                        |
| <b>FIGURE S5</b> | Measurement                                 | Values                                                                                                                                                                               | N                                           | Statistical                        | P value                                  |
| Figure S5A       | Charge (mean ± SEM)                         | GFP+ cells: 971.4932 ± 4764.166                                                                                                                                                      | [cells] n = 6                               |                                    |                                          |
| Figure S5B       | Charge (mean ± SEM)                         | L1 NGF: 62304.41 ± 36233.81                                                                                                                                                          | [cells] n = 9                               |                                    |                                          |
| Figure S5H       | CGE interneuron cell densities (mean ± SEM) | <b>Prox1+</b> : Vehicle: 114.782539 ± 6.54602903; Fluoxetine: 126.079933 ± 3.68675634                                                                                                | [brains] n = 3 for both groups              | 2-tailed unpaired Student's t-test | $p = 0.2071$ (NS)                        |
|                  |                                             | <b>Prox1+ Re+</b> : Vehicle: 24.3711865 ± 0.40454126; Fluoxetine: 26.0408337 ± 1.32701948                                                                                            | [brains] n = 3 for both groups              | 2-tailed unpaired Student's t-test | $p = 0.2951$ (NS)                        |
|                  |                                             | <b>Prox1+ VIP+ CR+</b> : Vehicle: 49.0143131 ± 0.79261738; Fluoxetine: 50.1843306 ± 4.20798866                                                                                       | [brains] n = 3 for both groups              | 2-tailed unpaired Student's t-test | $p = 0.4295$ (NS)                        |
|                  |                                             | <b>Prox1+ CR-Re-</b> : Vehicle: 36.062905 ± 4.33895612; Fluoxetine: 36.3178117 ± 4.38526967                                                                                          | [brains] n = 3 for both groups              | 2-tailed unpaired Student's t-test | $p = 0.9694$ (NS)                        |
| <b>FIGURE S6</b> | Measurement                                 | Values                                                                                                                                                                               | N                                           | Statistical                        | P value                                  |
| Figure S6B       | % of mCherry+ cells (mean ± SEM)            | Slc18a+ only cells: 28.42467 ± 2.9634; Slc6A4+ only cells: 13.81044 ± 1.4421; Slc18a+ and Slc6A4+ cells: 29.11470 ± 2.46729; Slc18a0- and Slc6A4- cells: 27.65019 ± 2.7433           | [brains] n = 5 for all groups               |                                    |                                          |
| Figure S6D       | Slc18a2 relative expression (mean ± SEM)    | shslc18a2-1: 0.26333 ± 0.03179797; shslc18a2-2: 1.003333 ± 0.16676664; shslc18a2-3: 0.6066667 ± 0.08819171; shslc18a2-4: 0.7366667 ± 0.09333333; shslc18a2-5: 0.6933333 ± 0.14678026 | [experiments] n = 3 for all groups          | 1-way Anova                        | $p = 0.0015$ (***) shLacZ vs shSlc18a2-1 |
| Figure S6G       | Slc18a2 relative expression (mean ± SEM)    | shLacZ: 100 ± 15.3447603, shslc18a2: 22.4988438 ± 6.0643048                                                                                                                          | [images] shLacZ = 14, shslc18a1 = 12        | Mann Whitney                       | $p < 0.0001$ (***)                       |
| <b>FIGURE S7</b> | Measurement                                 | Values                                                                                                                                                                               | N                                           | Statistical                        | P value                                  |
| Figure S7C       | CGE interneuron cell densities (mean ± SEM) | <b>Prox1+</b> : -CNO: 83.01319 ± 2.18582;+CNO: 111.997696 ± 8.354898                                                                                                                 | [brains] n = 4 for both groups              | 2-tailed unpaired Student's t-test | $p = 0.027$ (*)                          |
|                  |                                             | <b>Prox1+ CR-</b> : -CNO: 52.97631 ± 1.30069; +CNO: 71.6411254 ± 6.92400581                                                                                                          | [brains] n = 4 for both groups              | Mann Whitney                       | $p = 0.0286$ (*)                         |
|                  |                                             | <b>Prox1+ CR+</b> : -CNO: 30.03689 ± 0.9959; +CNO: 39.2727969 ± 1.52053381                                                                                                           | [brains] n = 4 for both groups              | 2-tailed unpaired Student's t-test | $p = 0.0023$ (**)                        |
